# Supplementary material for: Demonstrating the Applicability of Proton Transfer Reaction Mass Spectrometry to Quantify Volatiles Emitted by the Mycoparasitic Fungus Trichoderma atroviride in Real Time: Monitoring of Trichoderma-Based Biopesticides
Source: PubMed Central journal article supplement (PMC11157538; doi:10.1021/jasms.3c00456), 2024-05-06
Supplement: js3c00456_si_001.pdf [file js3c00456_si_001.pdf]

Supporting Information for

**Demonstrating the applicability of Proton Transfer Reaction Mass Spectrometry to quantify volatiles emitted by the mycoparasitic fungus *Trichoderma atroviride* in real time: monitoring of *Trichoderma*-based biopesticides**

**Running title: On-line biopesticide analysis using PTR-MS**

**Franziska Lochmann<sup>1</sup>, Daniel Flatschacher<sup>2</sup>, Verena Speckbacher<sup>2</sup>, Susanne Zeilinger<sup>2</sup>,  
Valentina Heuschneider<sup>1</sup>, Stephanie Bereiter<sup>1</sup>, Arne Schiller<sup>1</sup> and Veronika Ruzsanyi<sup>1\*</sup>**

<sup>1</sup> Institut für Atemgasanalytik, Universität Innsbruck, Innrain 52a and 80-82, A-6020

Innsbruck, Austria

<sup>2</sup> Institut für Mikrobiologie, Universität Innsbruck, Technikerstrasse 25d, A-6020 Innsbruck,

Austria

Email of corresponding author: Veronika.Ruzsanyi@uibk.ac.at

**Keywords:** microbial volatile organic compounds, proton transfer reaction time of flight mass spectrometry, mycoparasitic fungi, *Trichoderma atroviride*, 6-*acetyl*- $\alpha$ -pyrone

Address reprint requests to:

Dr. Veronika Ruzsanyi

University of Innsbruck, Institute for Breath Research

Innrain 52a, 6020 Innsbruck

E-Mail: veronika.ruzsanyi@uibk.ac.at

Telefon: +43 512 507 55603

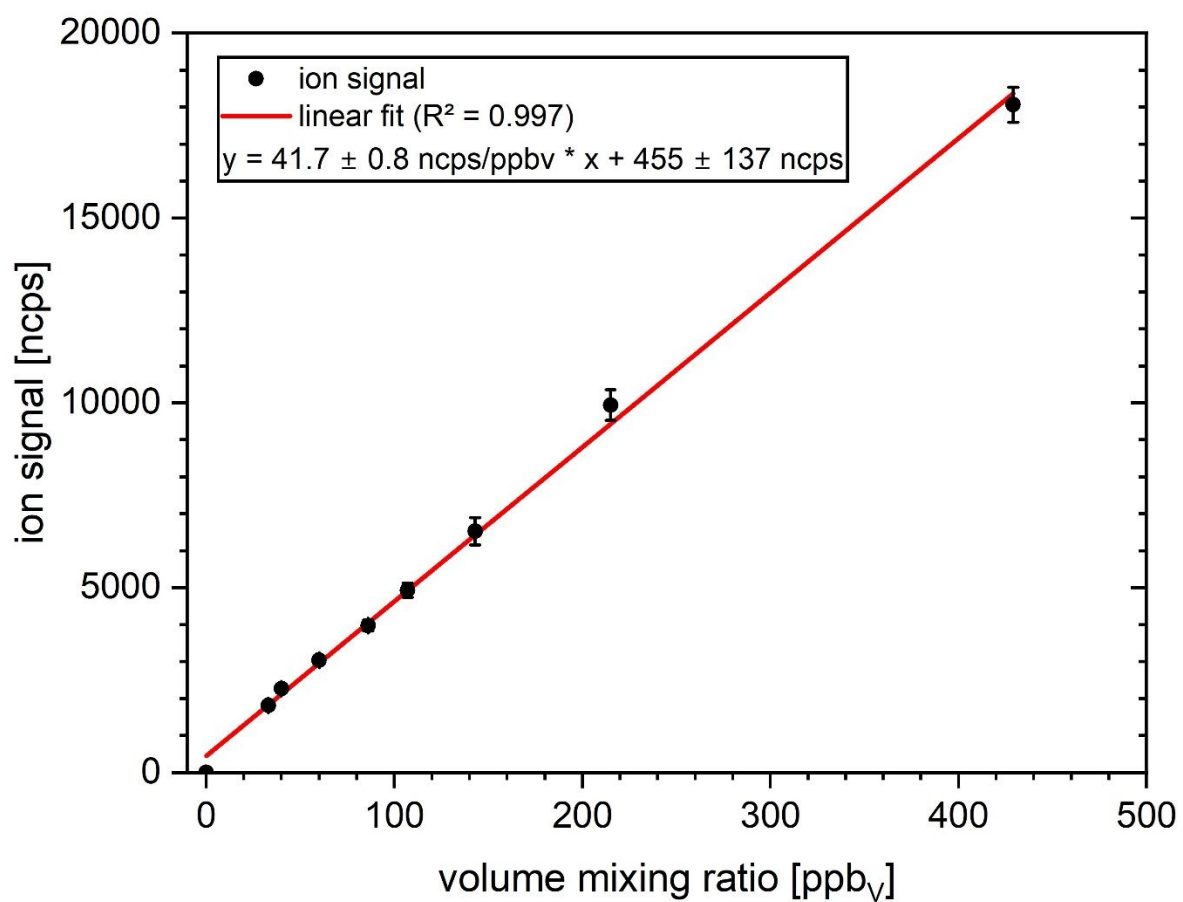

Figure S1: 8-point linear calibration curve used for the quantitative analysis of 6-PP emissions from *T. atroviride* cultures.

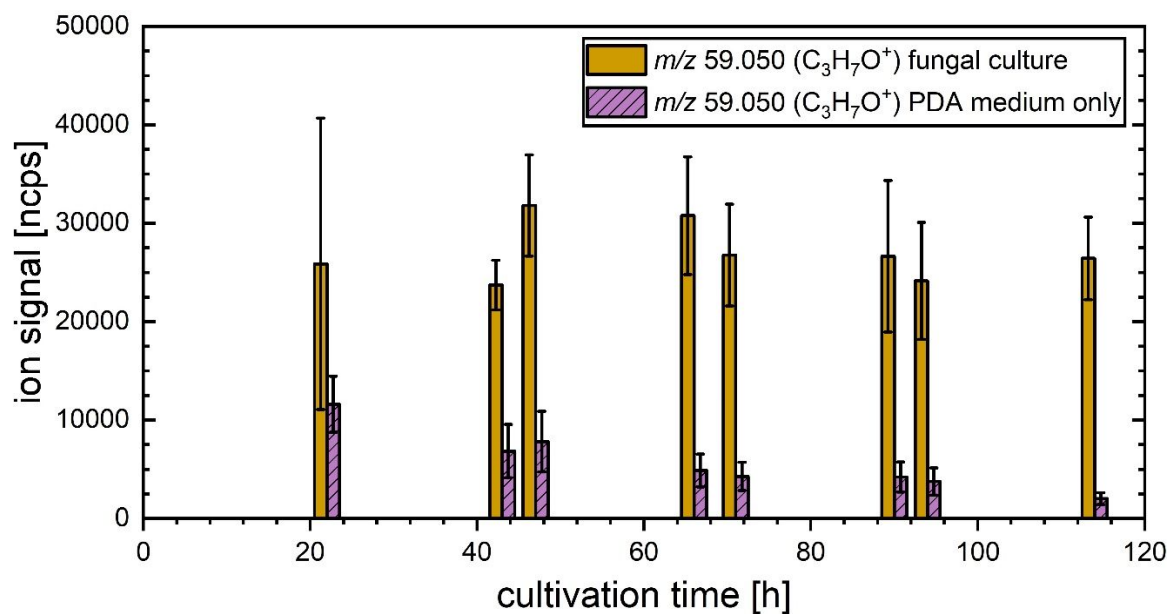

*Figure S2:* Changes in the product ion intensities at set measuring points for  $m/z$  59.050 ion intensity arising from cultures of *T. atroviride* and samples of PDA medium only during the five-day cultivation period. The bar graph and error bars indicate the average value and standard deviation between four independent biological replicates, respectively.

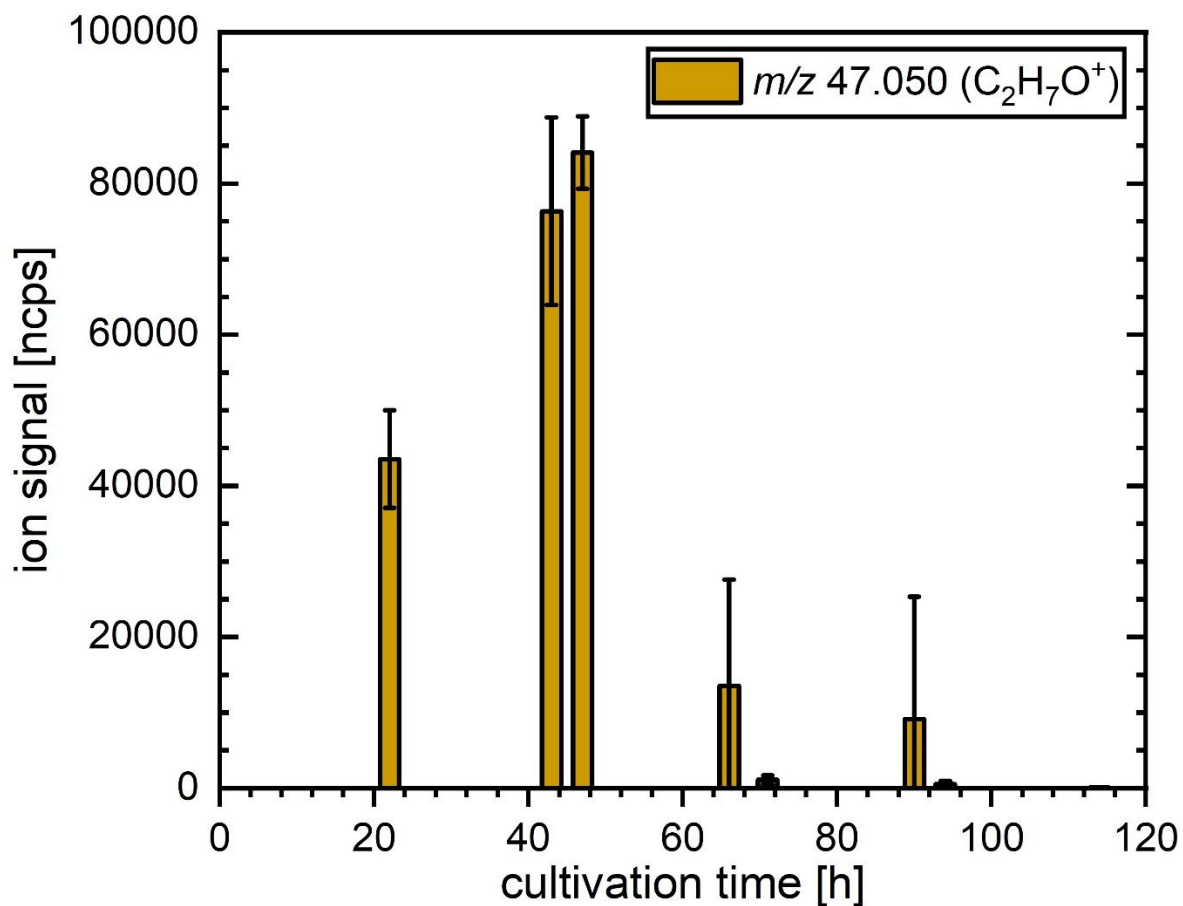

*Figure S3:* Changes in the product ion intensities at  $m/z$  47.050 ion arising from volatile emissions from cultures of *T. atroviride* during the five-day cultivation period. The bar graph and error bars indicate the average value and standard deviation between four independent biological replicates, respectively.

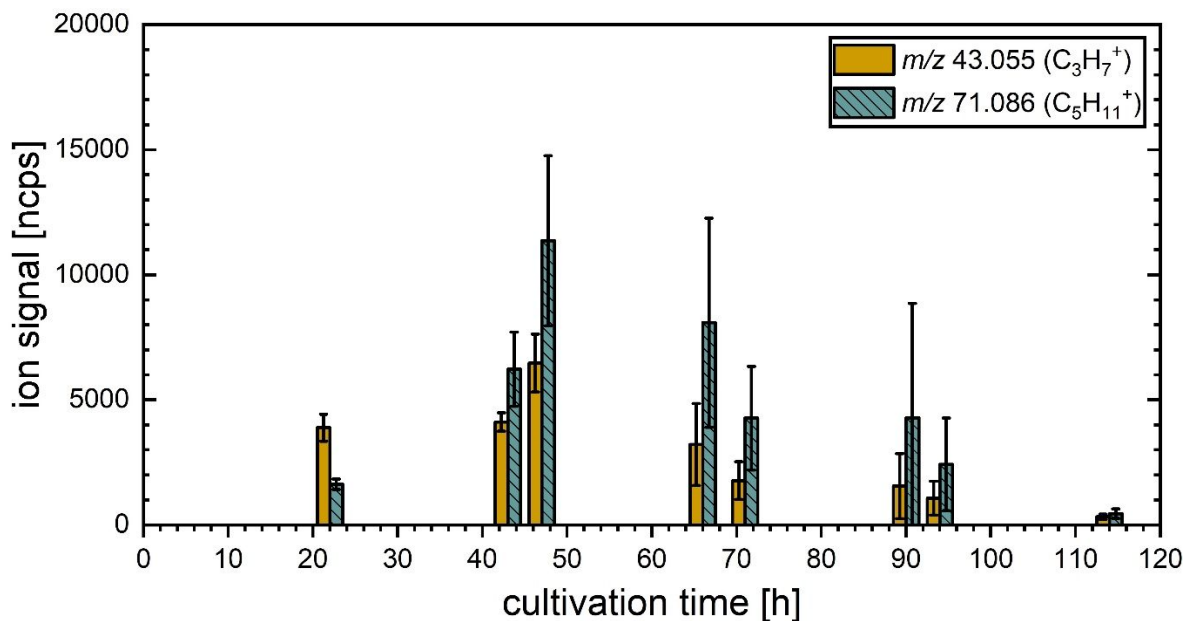

Figure S4: Changes in the product ion intensities at set measuring points for  $m/z$  43.055 and 71.086 ion intensities arising from cultures of *T. atroviride* during the five-day cultivation period. The bar graph and error bars indicate the average value and standard deviation between four independent biological replicates, respectively.

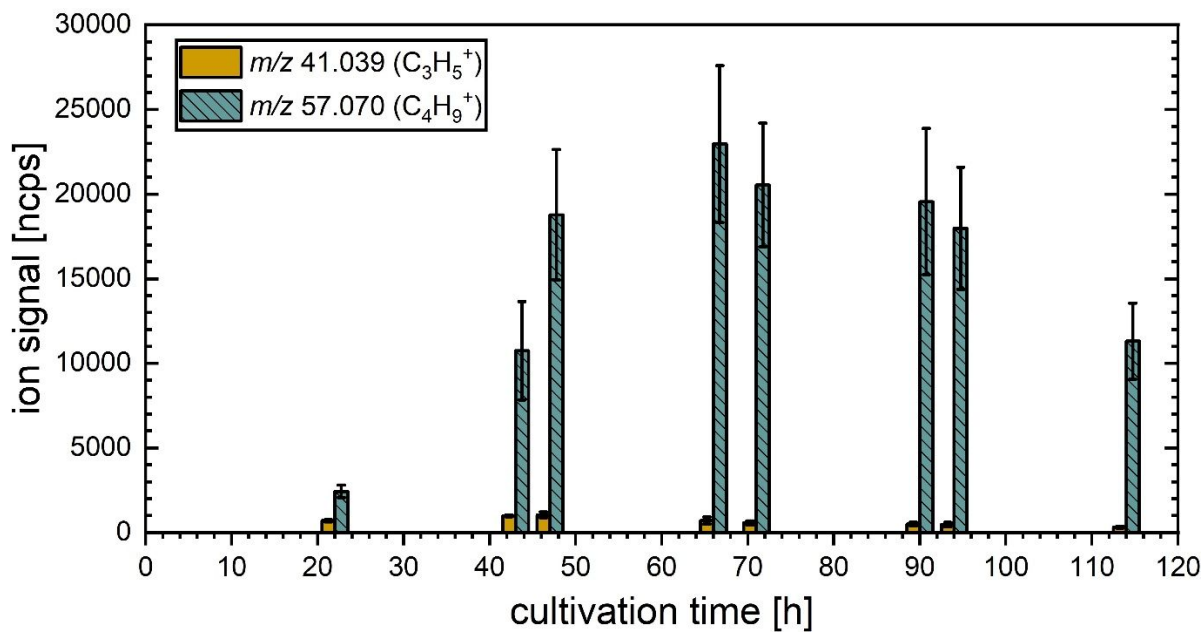

Figure S5: Changes in the product ion intensities at set measuring points for  $m/z$  41.039 and 57.070 ion intensities arising from cultures of *T. atroviride* during the five-day cultivation period. The bar graph and error bars indicate the average value and standard deviation between four independent biological replicates, respectively.
